# Supplementary material for: The NEIL1 G83D germline DNA glycosylase variant induces genomic instability and cellular transformation
Source: PubMed Central journal article supplement (PMC5689654; doi:10.18632/oncotarget.20716), 2017-09-08
Supplement: oncotarget-08-85883-s001.pdf [file oncotarget-08-85883-s001.pdf]

## The NEIL1 G83D germline DNA glycosylase variant induces genomic instability and cellular transformation

### SUPPLEMENTARY MATERIALS

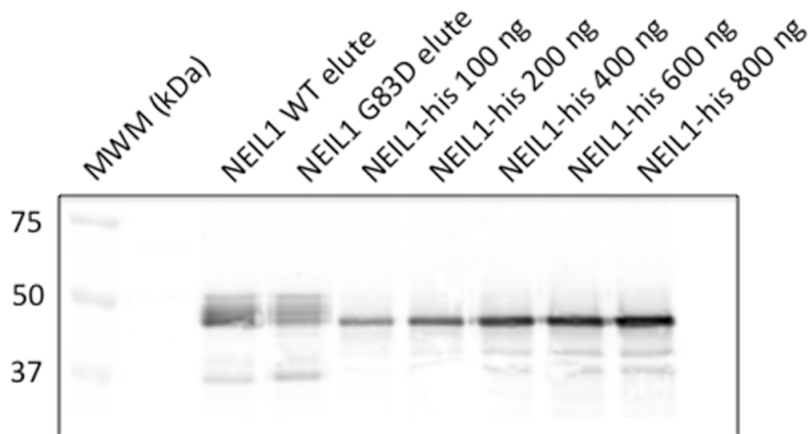

**Supplementary Figure 1: Quantitative western blotting of NEIL1 protein fractions.** Eluted NEIL1 complexes from the FLAG tag pull down, as described in the material and methods, were resolved in an SDS-page gel along with known amounts of His-tagged NEIL1. The proteins were transferred to a PVDF membrane and probed with a polyclonal antibody to NEIL1. The bands corresponding to NEIL1 were quantified and a linear regression was performed using the known amounts of the His-tagged NEIL1. The amount of NEIL1 WT and G83D were determined using a linear regression equation.

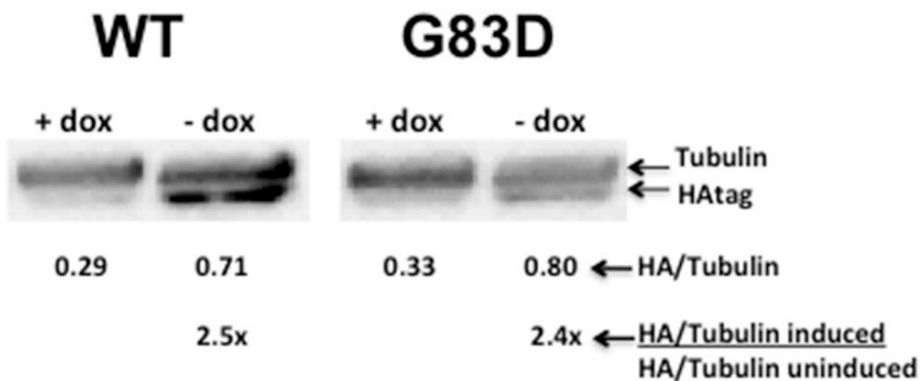

**Supplementary Figure 2: Western blot of MCF10A cells expressing either WT or G83D NEIL1.** Cells were harvested in RIPA buffer, lysed, and resolved on an SDS-PAGE gel. After blotting to PVDF the membrane was probed with antisera raised against the Hemagglutinin tag (HA) or tubulin, used as a loading control. In the presence of Dox, little expression of HA-tagged NEIL1 is present, but in the absence of Dox, NEIL1 is expressed. Expression of NEIL1 was normalized to that of Tubulin. The ratio of the band intensities of HA/tubulin is 0.71 for WT NEIL1 and 0.80 for G83D NEIL1. Therefore, equivalent expression is observed.

## Synchronized MCF10A pRVY-Neil1 Wild Type and G83D Variant Pools

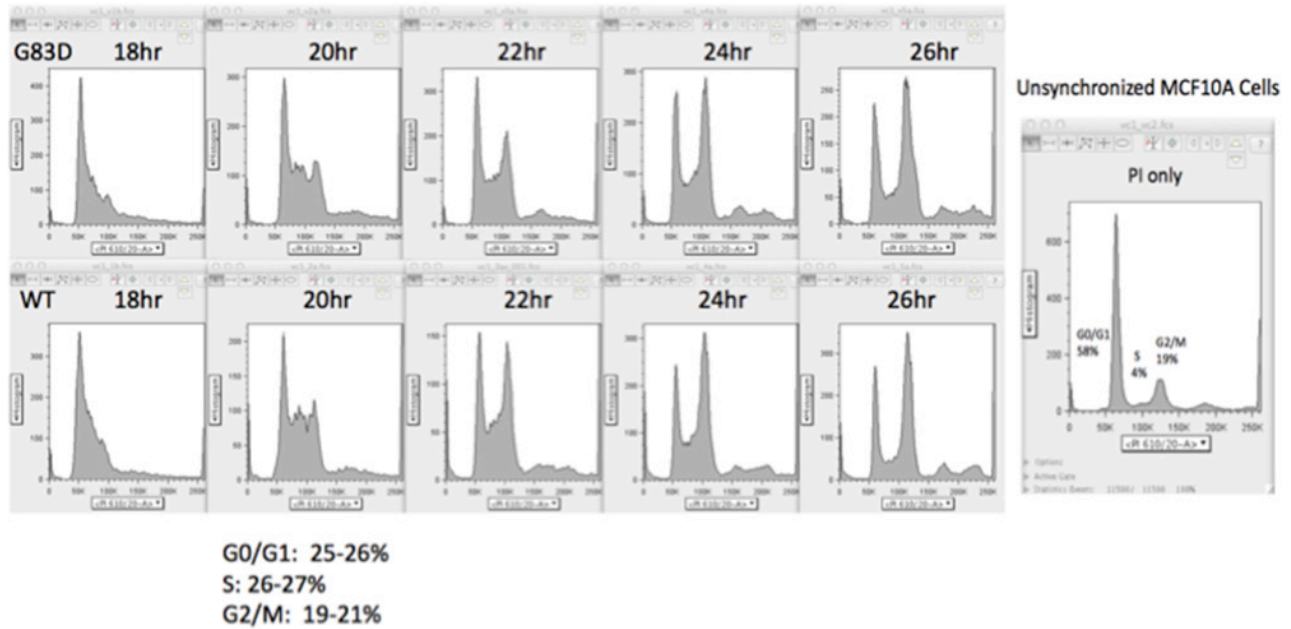

**Supplementary Figure 3: Cell cycle profiles of cells expressing exogenous G83D or WT NEIL1.** We synchronized cells for 48 hours by serum and growth factor deprivation, followed by growth in complete medium for 18 hours to reach S phase. We then performed flow analysis with Propidium Iodide (PI) to profile the cell cycle phases as a function of continued growth.

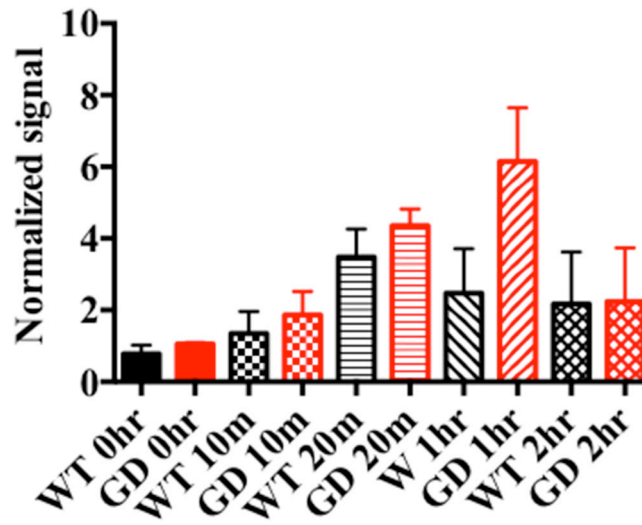

**Supplementary Figure 4: Chk1 is phosphorylated at similar levels in cells expressing G83D and WT NEIL1.** Quantification of levels of phosphorylated Chk1, normalized to alpha tubulin, at various times after treatment with hydrogen peroxide.
